# Supplementary material
Source: PubMed Central journal article supplement (PMC1458849)

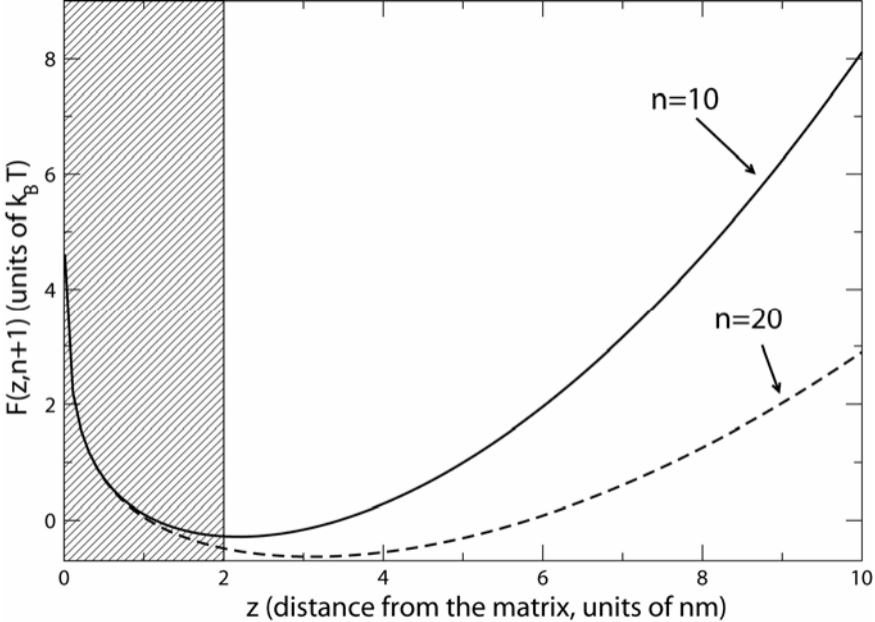

Supplement: pnas_0510496103_1.pdf [file pnas_0510496103_1.pdf]
